# Supplementary material
Source: publisher figshare collection journal article supplement (https://asha.figshare.com/articles/dataset/_/14669715)
Supplement: Supplementary file 1 [file 1]

**Supplemental Material S2.** Average performance of participants who completed the BDAE at the follow-up timepoint, differentiated by subtests across the SS, RS, and cumulative group.

|                | <b>Word<br/>Comprehension<br/>( /16)</b> | <b>Commands<br/>( /10)</b> | <b>Complex<br/>Ideational<br/>Material<br/>( /6)</b> | <b>Repetition<br/>Words<br/>( /5)</b> | <b>Repetition<br/>Sentences<br/>( /2)</b> | <b>Responsive<br/>Naming<br/>( /10)</b> | <b>Confrontation<br/>Naming<br/>( /30)</b> |
|----------------|------------------------------------------|----------------------------|------------------------------------------------------|---------------------------------------|-------------------------------------------|-----------------------------------------|--------------------------------------------|
| SS             | 15.38                                    | 10                         | 5.75                                                 | 5                                     | 1.38                                      | 10                                      | 26.38                                      |
| RS             | 15.14                                    | 10                         | 5.43                                                 | 4.71                                  | 2                                         | 10                                      | 24.86                                      |
| Total<br>Group | 15.27                                    | 10                         | 5.6                                                  | 4.87                                  | 1.67                                      | 10                                      | 25.67                                      |
