# Supplementary material
Source: publisher figshare collection journal article supplement (https://asha.figshare.com/articles/dataset/_/14669715)
Supplement: Supplementary file 2 [file 1]

**Supplemental Material S5.** Robust regression results of the linear regression model predicting acute language scores while controlling for demographic and stroke variables.

| <b>Intercept</b>    | <b>Value</b> | <b>Standard Error</b> | <b><i>t</i>-value</b> |
|---------------------|--------------|-----------------------|-----------------------|
| Group               | −0.013       | 0.034                 | −0.391                |
| Total Lesion Volume | −0.008       | 0.001                 | −13.906               |
| Age                 | −0.005       | 0.003                 | −1.940                |
| Education           | −0.008       | 0.011                 | −0.703                |
| Diabetes Status     | 0.022        | 0.031                 | 0.702                 |
| Hypertension Status | 0.001        | 0.042                 | −2.443                |

*Note.* Residual Standard Error = 0.318;  $df = 114$ .
