# Supplementary material
Source: publisher figshare collection journal article supplement (https://asha.figshare.com/articles/dataset/_/14669715)
Supplement: Supplementary file 3 [file 1]

**Supplemental Material S6.** Robust regression results of the nested regression for the RS group predicting acute language scores from acute lesion volume only.

| <b>Intercept</b>    | <b>Value</b> | <b>Standard Error</b> | <b><i>t</i>-value</b> |
|---------------------|--------------|-----------------------|-----------------------|
| Acute Lesion Volume | −0.001       | 0.001                 | −6.332                |

*Note.* Residual Standard Error = 0.367;  $df = 41$ .
