# Supplementary material
Source: publisher figshare collection journal article supplement (https://asha.figshare.com/articles/dataset/_/14669715)
Supplement: Supplementary file 4 [file 1]

**Supplemental Material S4.** Average performance of participants who completed the WAB at the follow-up timepoint, differentiated by subtests across the SS, RS, and cumulative group.

|                | <b>Auditory<br/>Verbal<br/>Comprehension<br/>( /60)</b> | <b>Auditory<br/>Word<br/>Recognition<br/>( /60)</b> | <b>Sequential<br/>Commands<br/>( /80)</b> | <b>Repetition<br/>( /100)</b> | <b>Object<br/>Naming<br/>( /60)</b> | <b>Word<br/>Fluency<br/>( /20)</b> | <b>Sentence<br/>Completion<br/>( /10)</b> | <b>Responsive<br/>Speech<br/>( /10)</b> |
|----------------|---------------------------------------------------------|-----------------------------------------------------|-------------------------------------------|-------------------------------|-------------------------------------|------------------------------------|-------------------------------------------|-----------------------------------------|
| SS             | 60.00                                                   | 58.73                                               | 74.91                                     | 95.82                         | 58.55                               | 15.36                              | 9.73                                      | 9.91                                    |
| RS             | 58.50                                                   | 48.75                                               | 61.00                                     | 75                            | 50.25                               | 11.50                              | 7.50                                      | 6.50                                    |
| Total<br>Group | 59.60                                                   | 56.07                                               | 71.20                                     | 90.27                         | 56.33                               | 14.33                              | 9.13                                      | 9.53                                    |
