# Supplementary material
Source: publisher figshare collection journal article supplement (https://asha.figshare.com/articles/dataset/_/14669715)
Supplement: Supplementary file 5 [file 1]

**Supplemental Material S8.** Robust regression results of the nested regression for the RS group predicting acute language scores from acute lesion volume + chronic lesion volume + chronic lesion classification.

| <b>Intercept</b>      | <b>Value</b> | <b>Standard Error</b> | <b><i>t</i>-value</b> |
|-----------------------|--------------|-----------------------|-----------------------|
| Acute Lesion Volume   | −0.001       | 0.002                 | −5.870                |
| Chronic Lesion Volume | 0.000        | 0.007                 | 0.039                 |
| Chronic Infarct Other | 0.139        | 0.141                 | 0.986                 |
| Chronic Infarct RH    | 0.187        | 0.194                 | 0.960                 |

*Note.* Residual Standard Error = 0.338;  $df = 38$ .
