# Supplementary material
Source: publisher figshare collection journal article supplement (https://asha.figshare.com/articles/dataset/_/14669715)
Supplement: Supplementary file 6 [file 1]

**Supplemental Material S1.** Average performance of participants who completed the BDAE at the acute timepoint, differentiated by subtests across the SS, RS, and cumulative group.

|                | <b>Word<br/>Comprehension<br/>( /16)</b> | <b>Commands<br/>( /10)</b> | <b>Complex<br/>Ideational<br/>Material<br/>( /6)</b> | <b>Repetition<br/>Words<br/>( /5)</b> | <b>Repetition<br/>Sentences<br/>( /2)</b> | <b>Responsive<br/>Naming<br/>( /10)</b> | <b>Confrontation<br/>Naming<br/>( /30)</b> |
|----------------|------------------------------------------|----------------------------|------------------------------------------------------|---------------------------------------|-------------------------------------------|-----------------------------------------|--------------------------------------------|
| SS             | 13.25                                    | 8.3                        | 4.09                                                 | 3.91                                  | 1.42                                      | 7.48                                    | 19.97                                      |
| RS             | 14.13                                    | 8.62                       | 4.63                                                 | 3.47                                  | 1.29                                      | 6.88                                    | 16.65                                      |
| Total<br>Group | 13.54                                    | 8.40                       | 4.27                                                 | 3.76                                  | 1.38                                      | 7.27                                    | 18.77                                      |
