# Supplementary material
Source: publisher figshare collection journal article supplement (https://asha.figshare.com/articles/dataset/_/14669715)
Supplement: Supplementary file 7 [file 1]

**Supplemental Material S3.** Average performance of participants who completed the WAB at the acute timepoint, differentiated by subtests across the SS, RS, and cumulative group.

|                | <b>Auditory<br/>Verbal<br/>Comprehension<br/>( /60)</b> | <b>Auditory<br/>Word<br/>Recognition<br/>( /60)</b> | <b>Sequential<br/>Commands<br/>( /80)</b> | <b>Repetition<br/>( /100)</b> | <b>Object<br/>Naming<br/>( /60)</b> | <b>Word<br/>Fluency<br/>( /20)</b> | <b>Sentence<br/>Completion<br/>( /10)</b> | <b>Responsive<br/>Speech<br/>( /10)</b> |
|----------------|---------------------------------------------------------|-----------------------------------------------------|-------------------------------------------|-------------------------------|-------------------------------------|------------------------------------|-------------------------------------------|-----------------------------------------|
| SS             | 54.59                                                   | 51.72                                               | 63.44                                     | 80.02                         | 49.09                               | 11.63                              | 8.37                                      | 8.22                                    |
| RS             | 55.62                                                   | 53.85                                               | 63.85                                     | 82.46                         | 50.62                               | 9.23                               | 9.04                                      | 8.73                                    |
| Total<br>Group | 54.96                                                   | 52.49                                               | 63.59                                     | 80.90                         | 49.64                               | 10.76                              | 8.61                                      | 8.40                                    |
