# Supplementary material
Source: publisher figshare collection journal article supplement (https://asha.figshare.com/articles/dataset/_/14669715)
Supplement: Supplementary file 8 [file 1]

**Supplemental Material S7.** Robust regression results of the nested regression for the RS group predicting acute language scores from acute + chronic lesion volumes.

| <b>Intercept</b>      | <b>Value</b> | <b>Standard Error</b> | <b><i>t</i>-value</b> |
|-----------------------|--------------|-----------------------|-----------------------|
| Acute Lesion Volume   | −0.001       | 0.002                 | −5.881                |
| Chronic Lesion Volume | −0.002       | 0.007                 | −0.295                |

*Note.* Residual Standard Error = 0.371;  $df = 40$ .
